# Supplementary material for: Dominant negative Gfi1b mutations cause moderate thrombocytopenia and an impaired stress thrombopoiesis associated with mild erythropoietic abnormalities in mice
Source: PubMed Central journal article supplement — Haematologica. 2019 Nov 21;105(10):2457–70. doi: 10.3324/haematol.2019.222596 (PMC7556681; doi:10.3324/haematol.2019.222596), 2019-11-21
Supplement: 2019_222596-DisclosuresContributions.pdf [file 2019_222596-DisclosuresContributions.pdf]

Haematologica  
HAEMATOL/2019/222596  
Version 3

Dominant negative Gfi1b mutations cause moderate thrombocytopenia  
and an impaired stress thrombopoiesis associated with mild  
erythropoietic abnormalities in mice

Hugues Beauchemin, Peiman Shooshtharizadeh, Jordan Pinder,  
Graham Dellaire, and Tarik Möröy

Disclosures: none

Contributions: HB, PS and JP did the experiments. HB did the data analysis. HB and TM wrote the manuscript. TM and GD have initiated the project, TM oversaw the interpretation and presentation of the data and provided the funding.
